# Supplementary material for: Experimental trends and theoretical descriptors for electrochemical reduction of carbon dioxide to formate over Sn-based bimetallic catalysts
Source: Royal Society of Chemistry journal article supplement (doi:10.1039/d4ta02315c), 2024-01-01
Supplement: d4ta02315c1.pdf [file d4ta02315c1.pdf]

## *Supporting information*

### **Experimental Trends and Theoretical Descriptors for Electrochemical Reduction of Carbon Dioxide to Formate over Sn-based Bimetallic Catalysts**

Xue Han, ‡<sup>a</sup> Binhong Wu, ‡<sup>b</sup> Yan Wang, ‡<sup>c</sup> Nathaniel N. Nichols<sup>d</sup>, Yongjun Kwon<sup>b</sup>, Yong Yuan<sup>a</sup>, Zhenhua Xie<sup>d</sup>, Sinwoo Kang<sup>a,d</sup>, Byeongjun Gil<sup>a</sup>, Caiqi Wang<sup>b</sup>, Tianyou Mou<sup>a</sup>, Hongfei Lin<sup>b</sup>, Yao Nian<sup>\*e</sup>, Qiaowan Chang,<sup>\*b</sup>

[a] Brookhaven National Laboratory, Upton, New York 11973, United States

[b] The Gene and Linda Voiland School of Chemical Engineering and Bioengineering, Washington State University, Pullman, WA 99164, United States

[c] School of Chemical Engineering, Sichuan University, Chengdu, 610065, PR China

[d] Department of Chemical Engineering, Columbia University, 500 W. 120th St., New York, NY 10027, United States

[e] School of Chemical Engineering and Technology, Tianjin University, Tianjin 300072, PR China

‡Xue Han, Binhong Wu and Yan Wang contributed equally to this work.

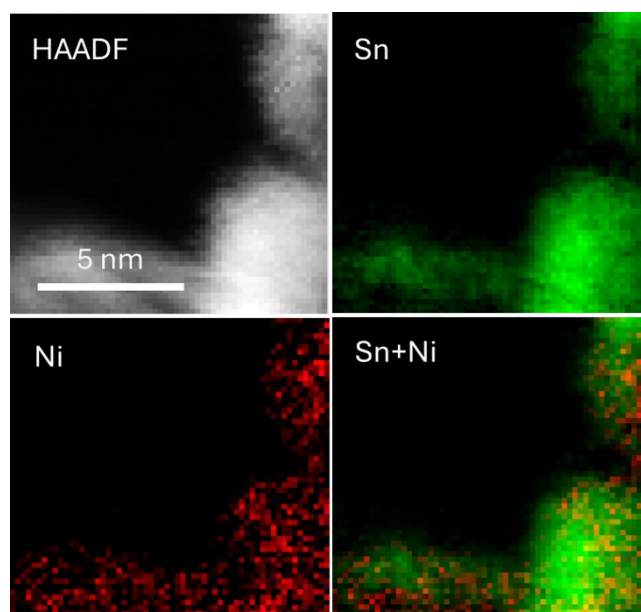

**Figure S1.** Scanning transmission electron microscopy and elemental mapping analysis of SnNi.

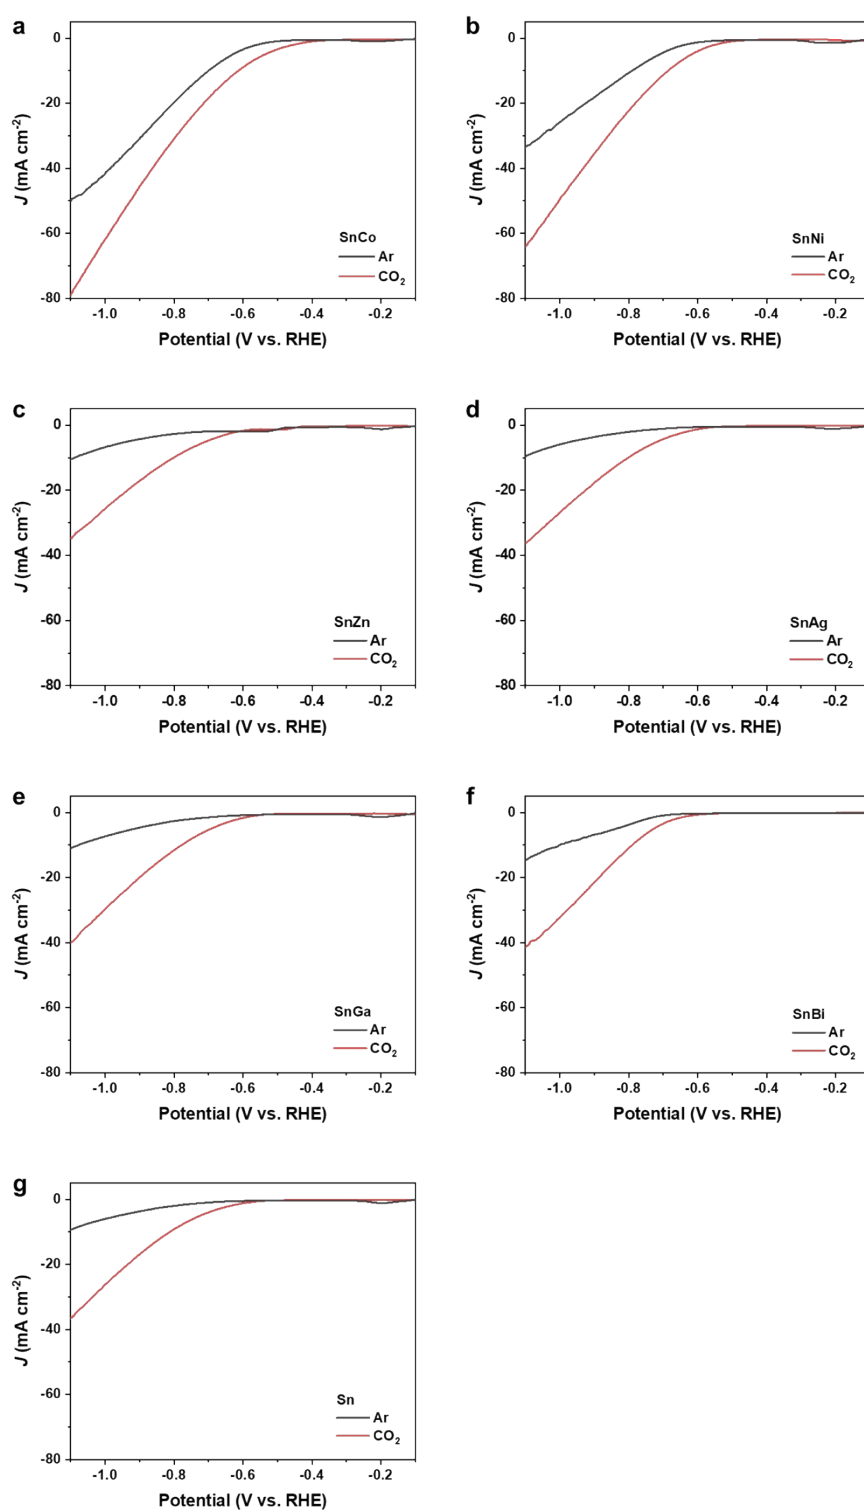

**Figure S2.** LSV curves of **a** SnCo, **b** SnNi, **c** SnZn, **d** SnAg, **e** SnGa, **f** SnBi and **g** Sn nanoparticles in Ar-saturated 0.5 M KHCO<sub>3</sub> electrolyte and CO<sub>2</sub>-saturated electrolyte.

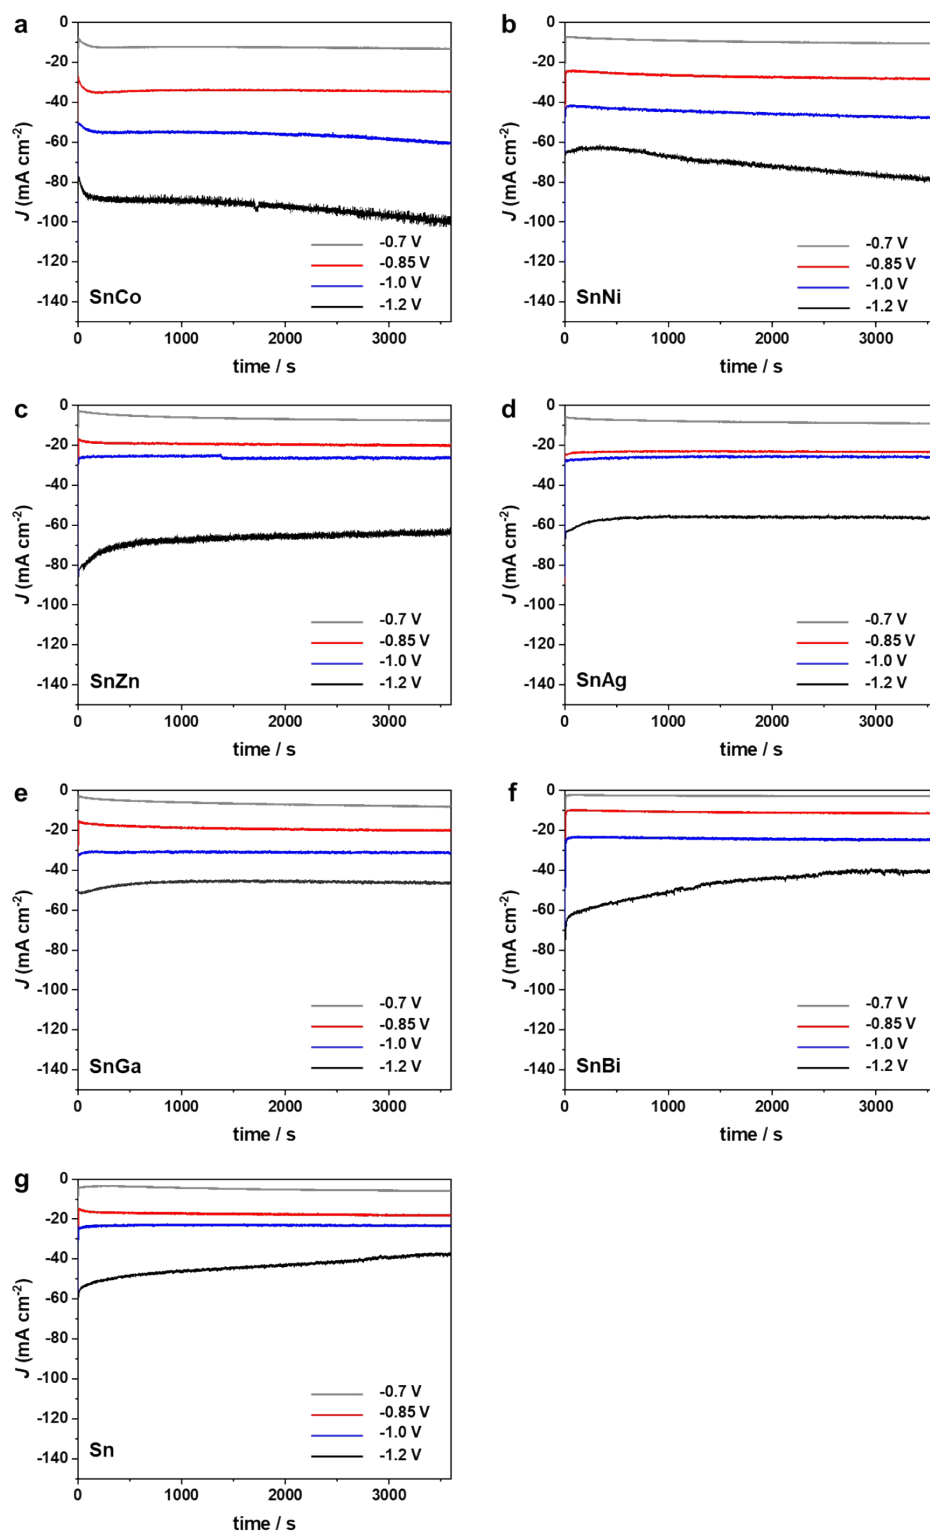

**Figure S3.** Chronoamperometric curves of **a** SnCo, **b** SnNi, **c** SnZn, **d** SnAg, **e** SnGa, **f** SnBi and **g** Sn at different potentials (vs. RHE).

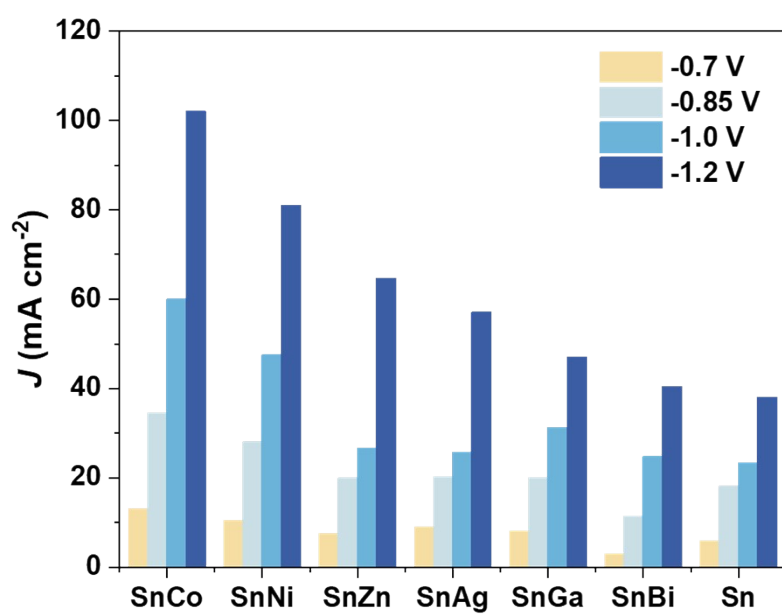

**Figure S4.** Total current density of SnCo, SnNi, SnZn, SnAg, SnGa, SnBi and Sn at different potentials (vs. RHE).

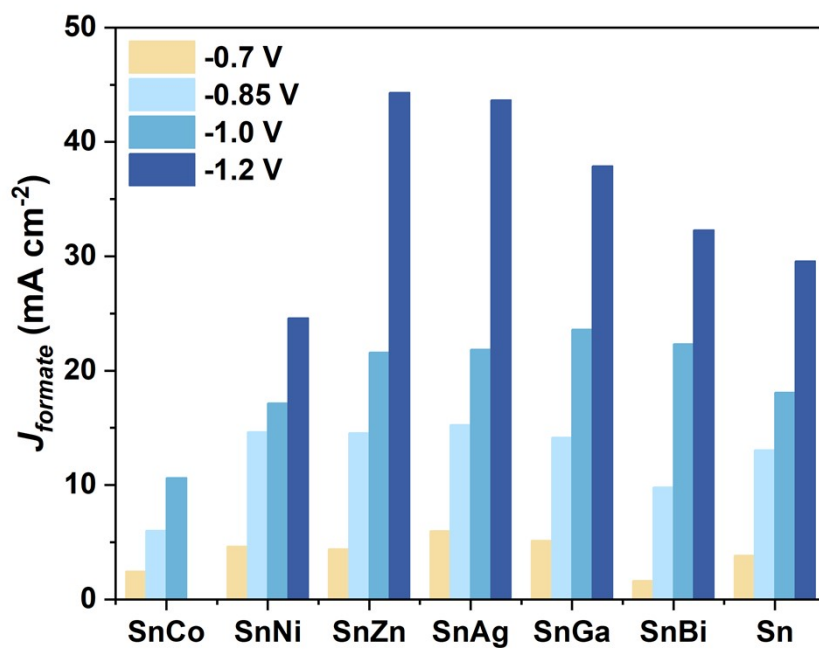

**Figure S5.** Partial current density of formate of SnCo, SnNi, SnZn, SnAg, SnGa, SnBi and Sn at different potentials (vs. RHE).

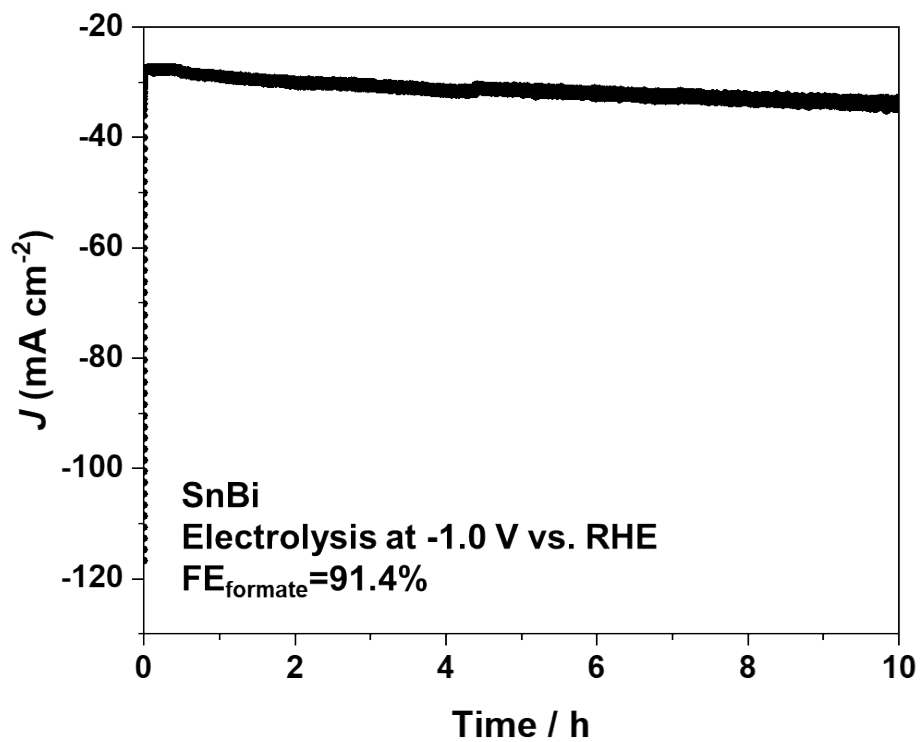

**Figure S6.** Stability test of SnBi for 10 h at -1.0 V.

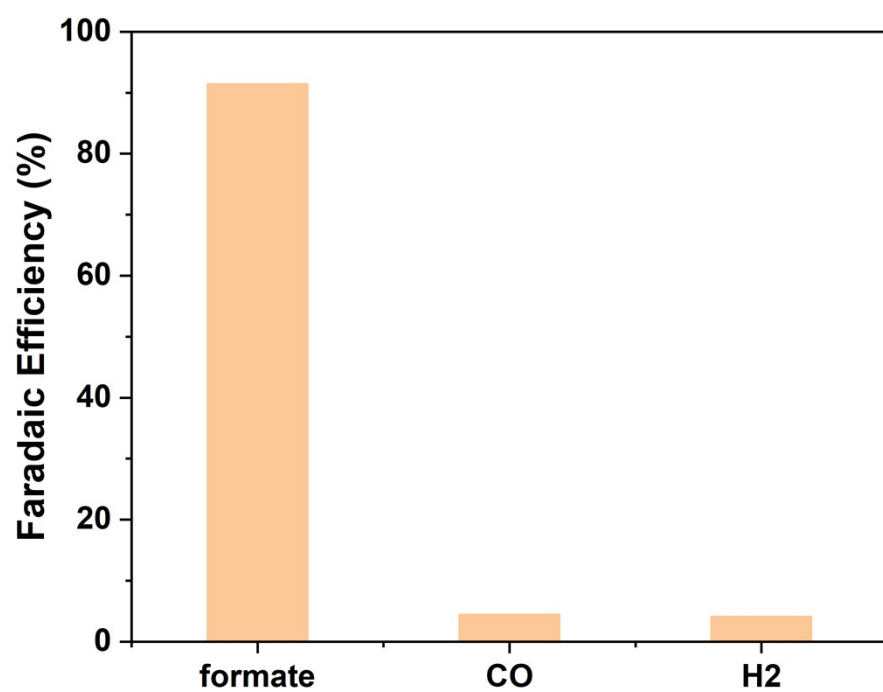

**Figure S7.** Faradaic efficiency of SnBi after 10 h.



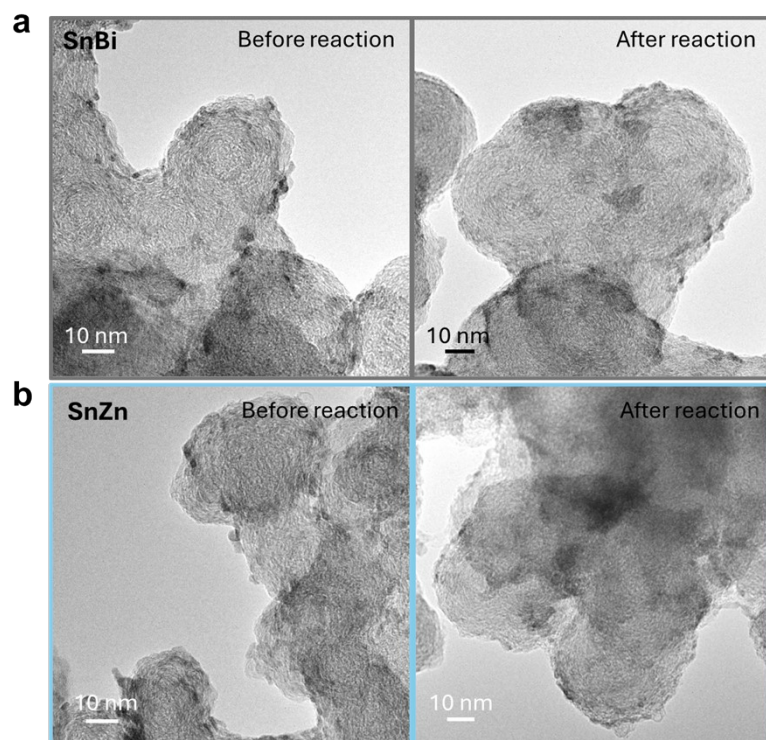

**Figure S8.** TEM images of SnBi and SnZn before and after the reaction.

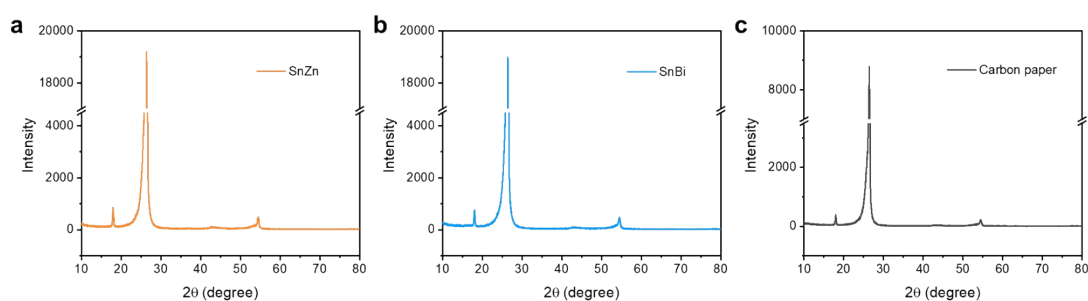

**Figure S9.** XRD patterns of SnBi and SnZn after the reaction.

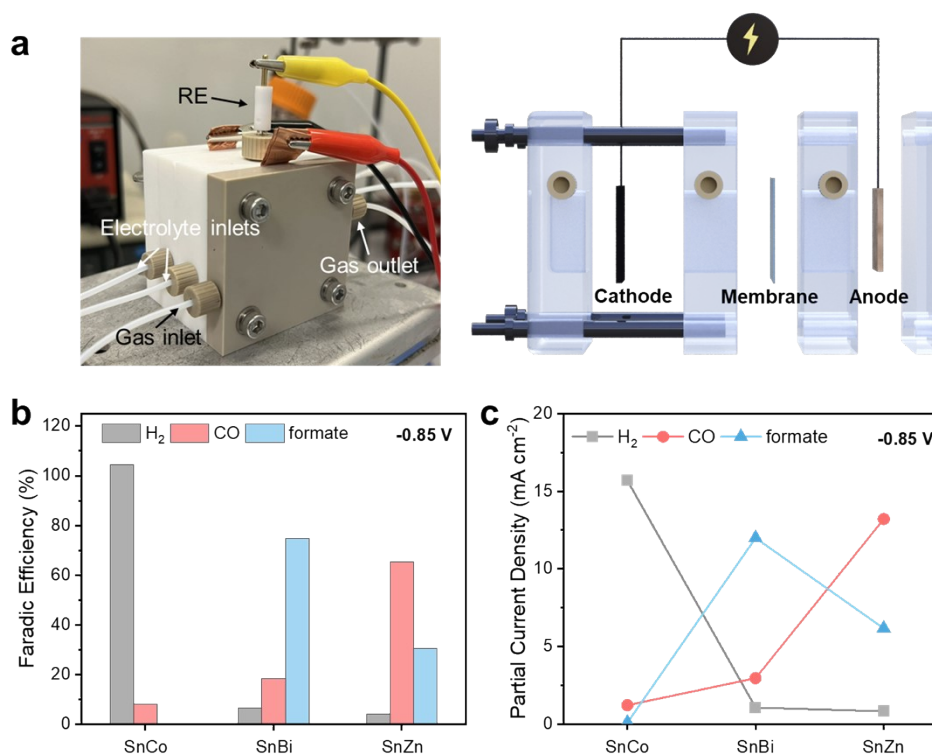

**Figure S10.** Flow cell test of SnCo, SnBi and SnZn. **a** schematic illustration of the flow cell experimental set-up, **b** FEs and **c** partial current densities of formate, CO, and H<sub>2</sub> at -0.85 V.

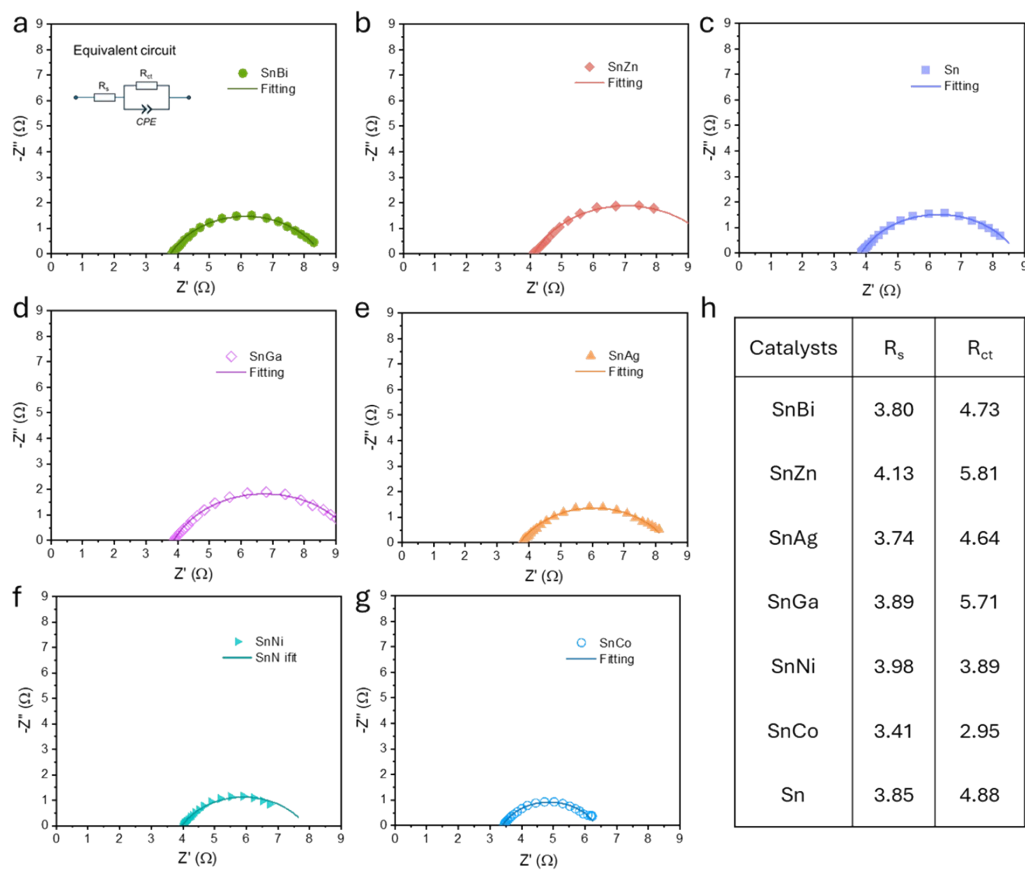

**Figure S11.** EIS measurements of Sn-M catalysts at -0.9 V during CO<sub>2</sub>RR. **a** SnBi, **b** SnZn, **c** Sn, **d** SnGa, **e** SnAg, **f** SnNi, **g** SnCo. **h** Fitting parameters obtained from Nyquist plots.

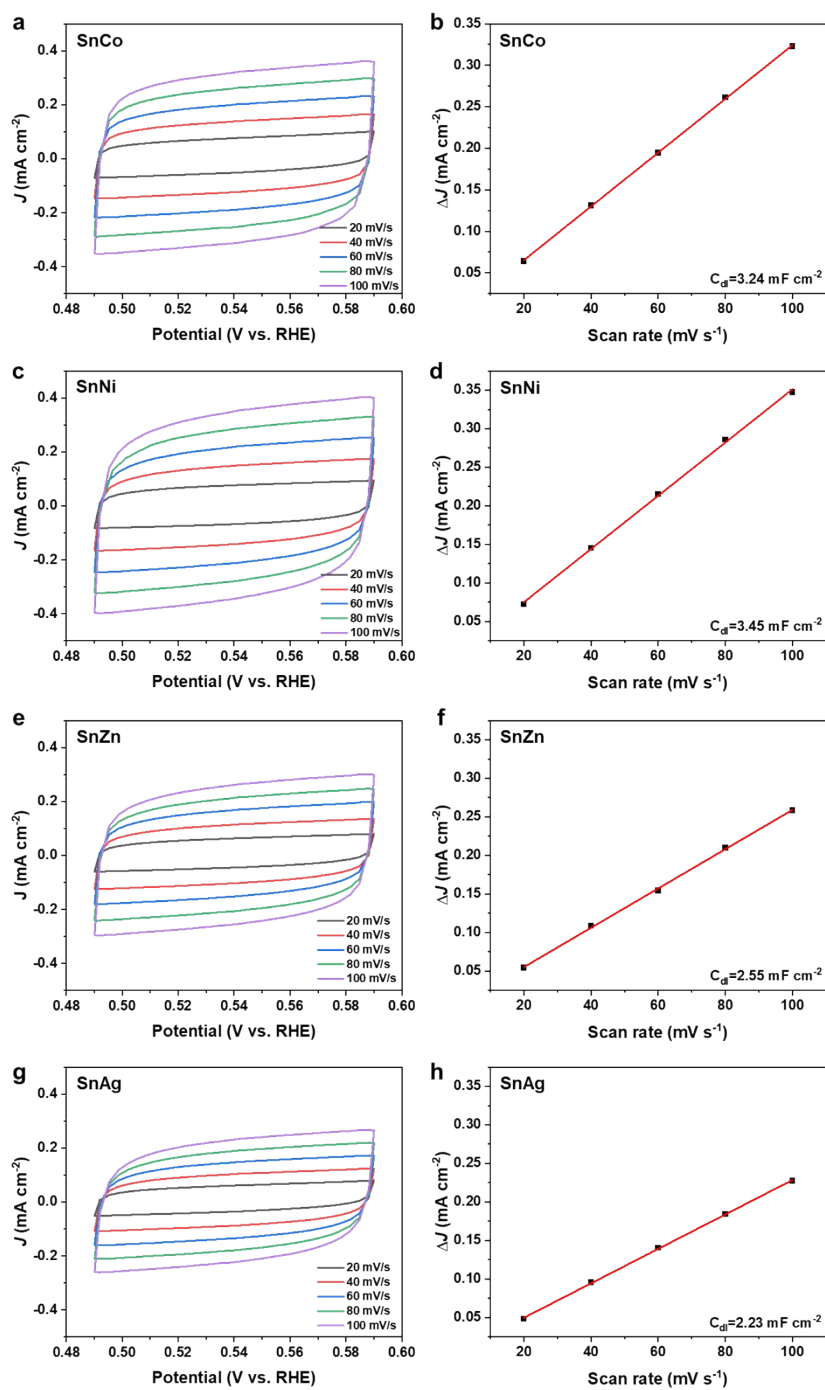

**Figure S12.** CV curves and corresponding  $C_{dl}$  for **a, b** SnCo, **c, d** SnNi, **e, f** SnZn and **g, h** SnAg, respectively.

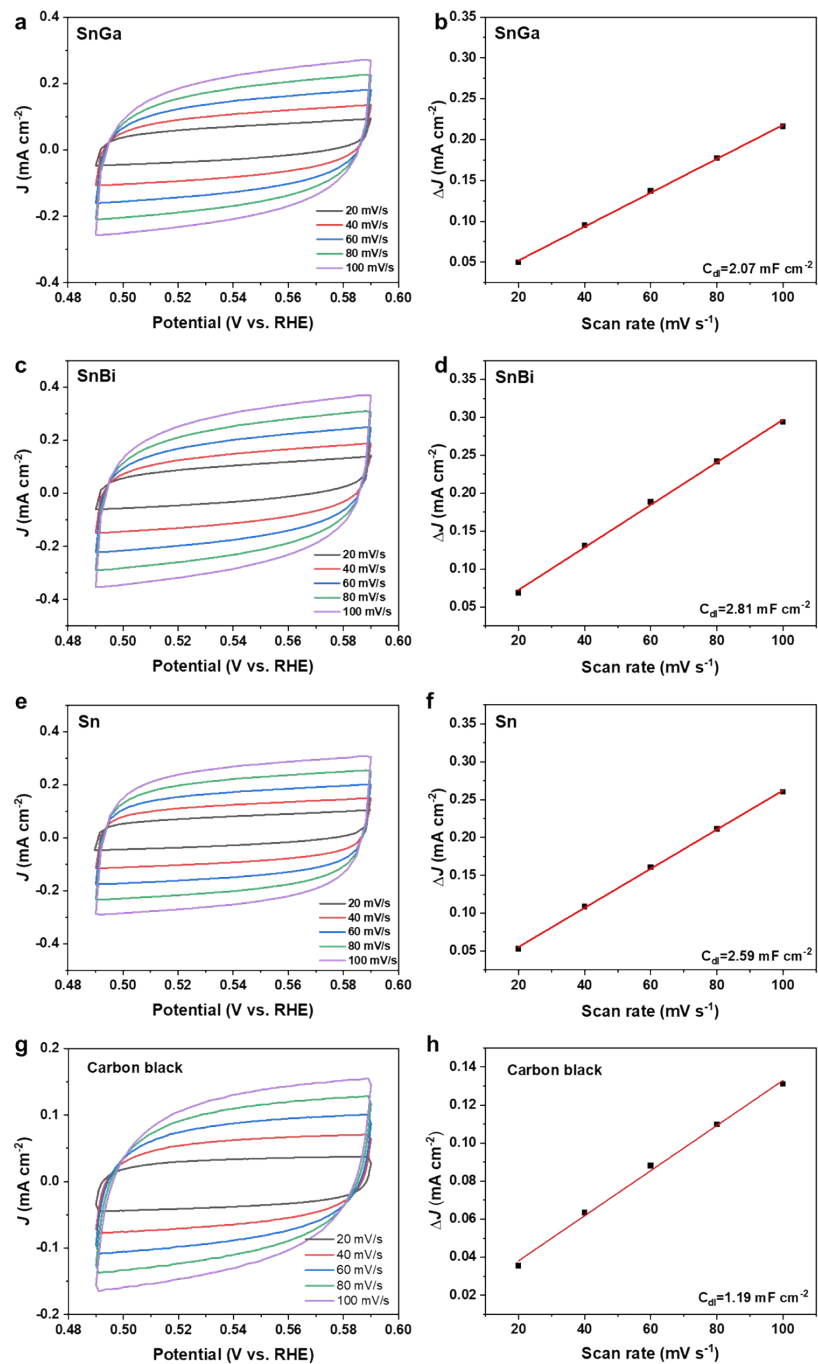

**Figure S13.** CV curves and corresponding  $C_{dl}$  for **a, b** SnGa, **c, d** SnBi, **e, f** Sn, and **g, h** carbon black, respectively.

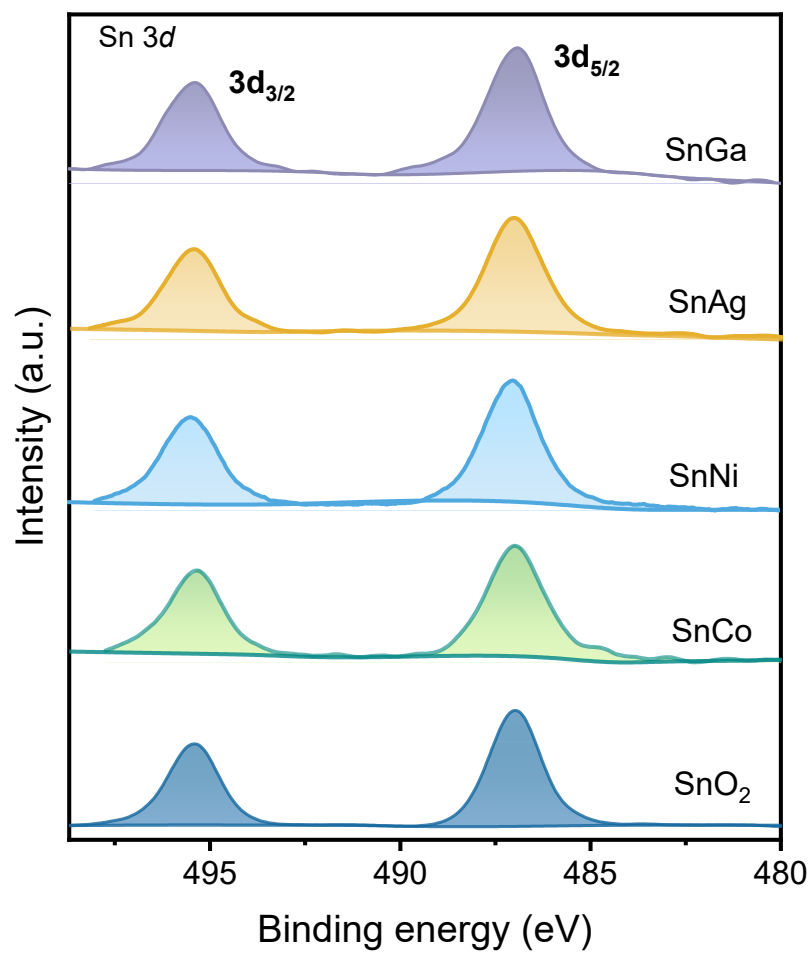

**Figure S14.** XPS Sn 3d spectra of SnGa, SnAg, SnNi, SnCo, and SnO<sub>2</sub> reference.

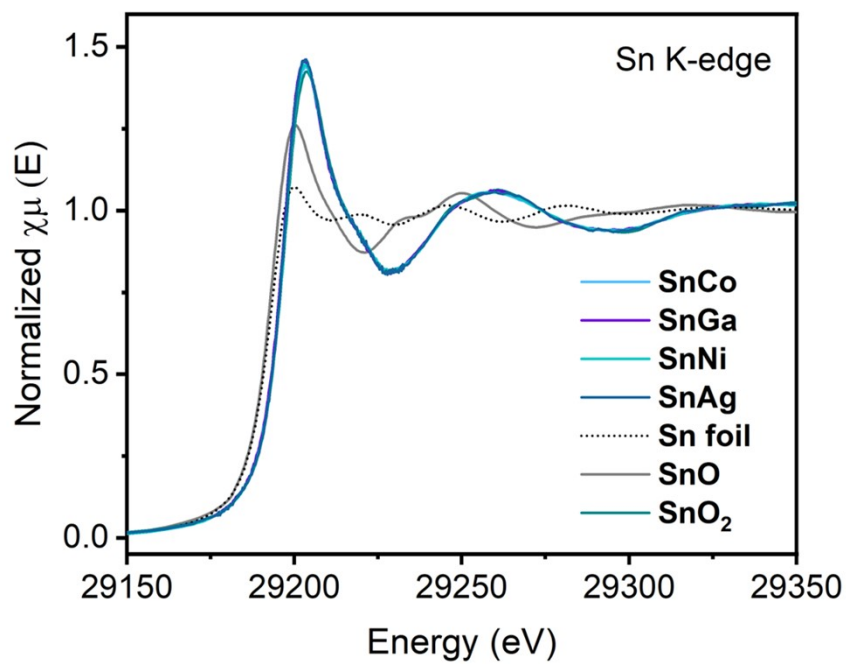

**Figure S15.** XANES spectra at the Sn K-edge of SnCo, SnGa, SnNi, SnAg, Sn foil, SnO, and SnO<sub>2</sub> standards.

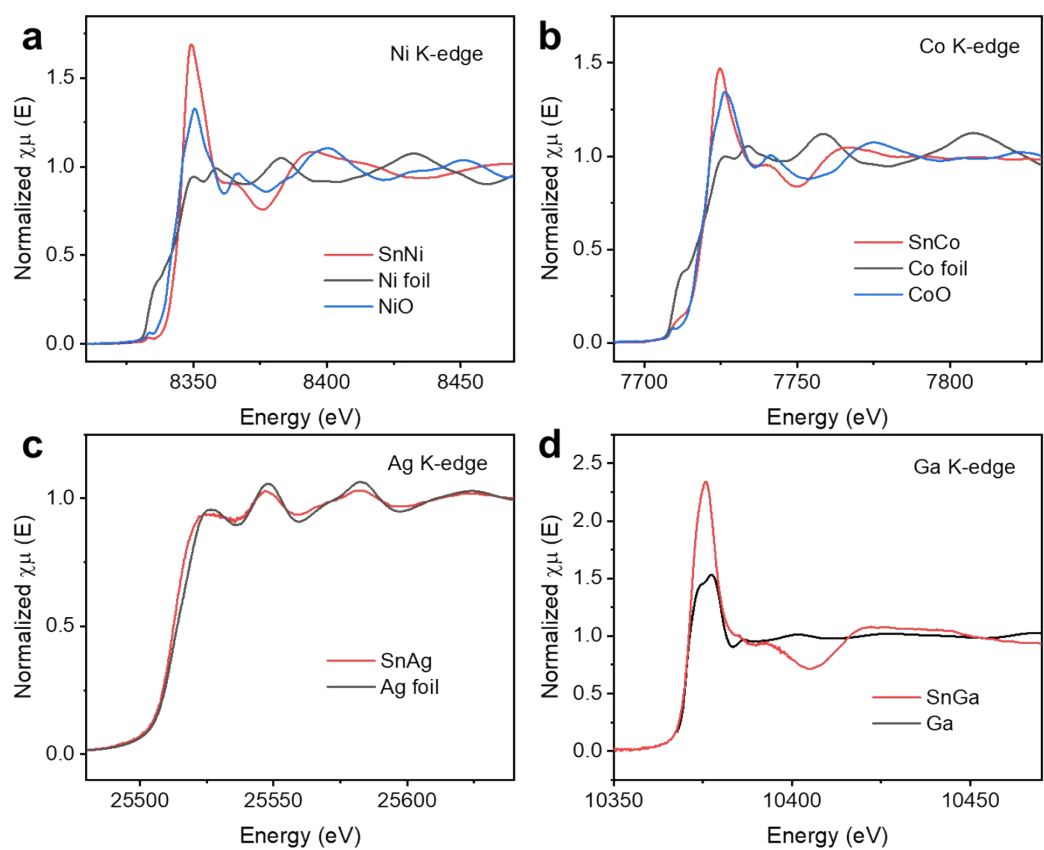

**Figure S16.** XANES spectra at the **a** Ni K-edge of SnNi, **b** Co K-edge of SnCo, **c** Ag K-edge of SnAg, **d** Ga K-edge of SnGa.



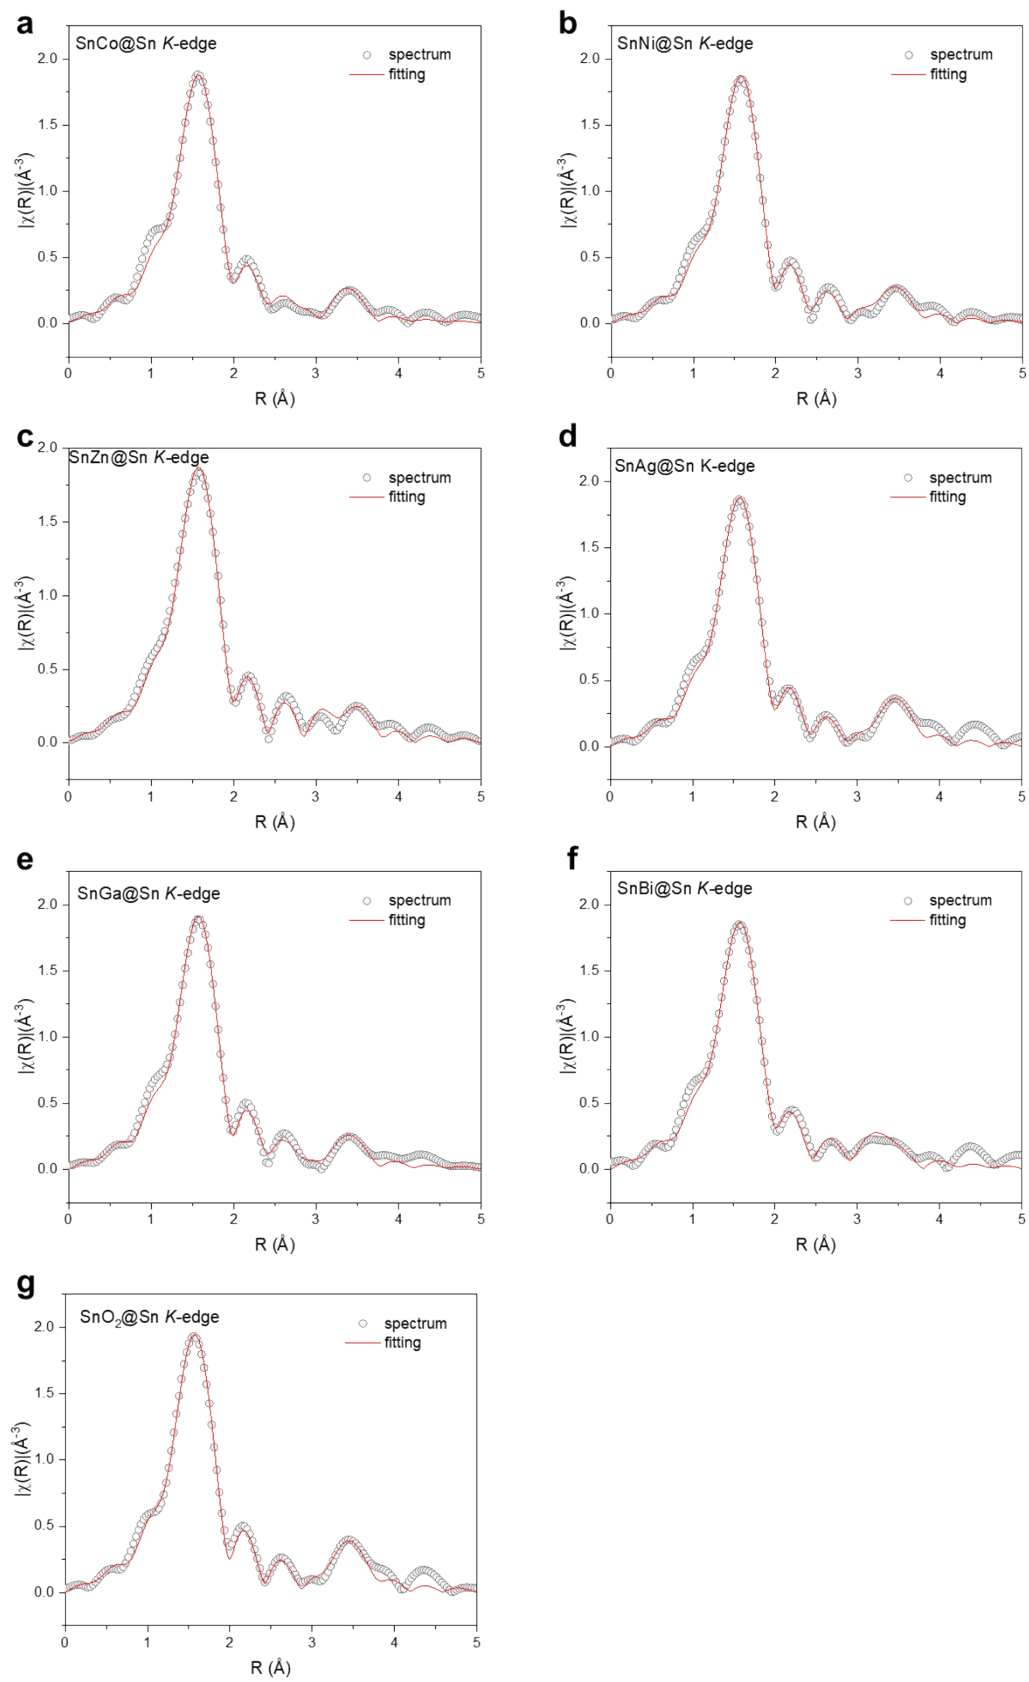

**Figure S17.** EXAFS fitting results of Sn-M bimetallic catalysts at Sn K-edge.

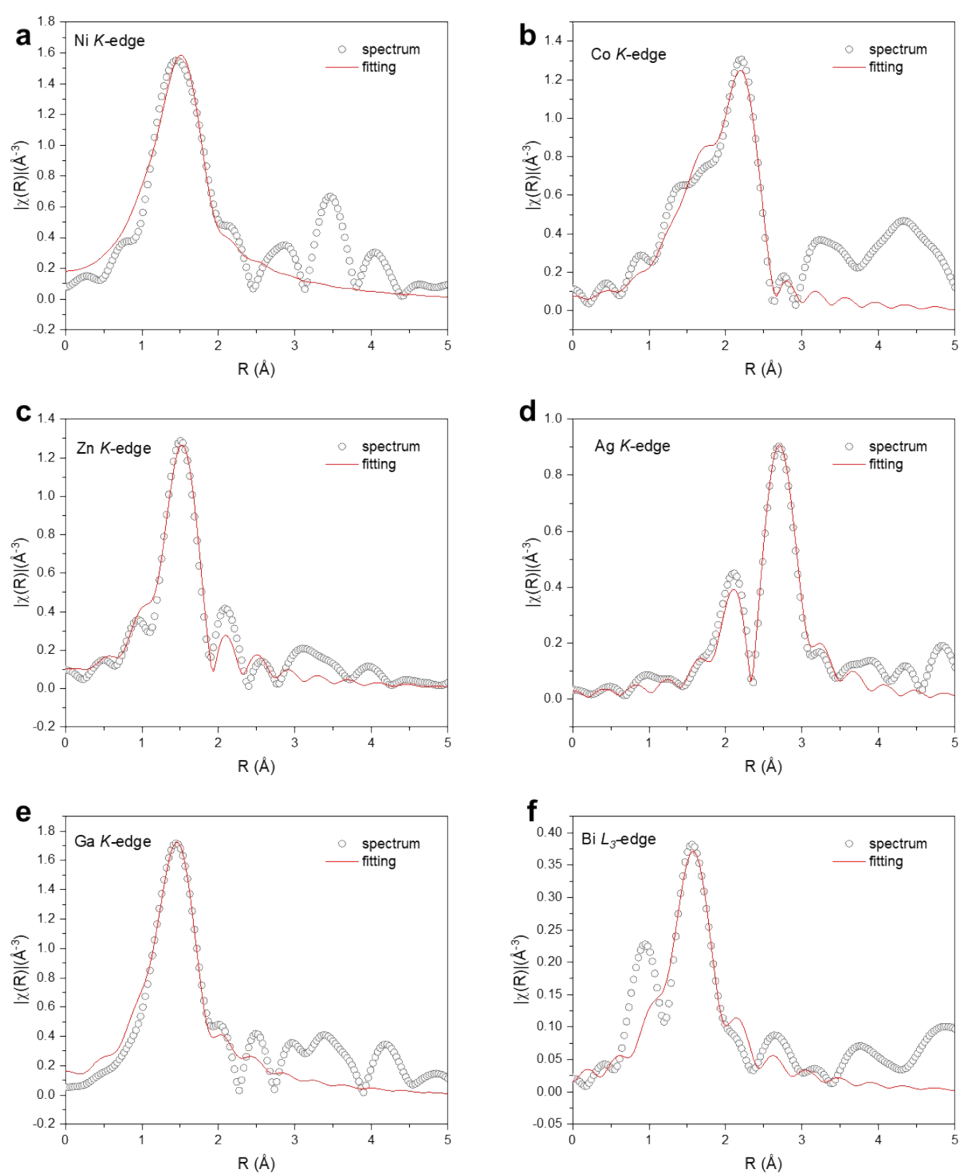

**Figure 18.** EXAFS fitting results of Sn-M bimetallic catalysts at Ni K-edge, Co K-edge, Zn K-edge, Ag K-edge, Ga K-edge, Bi  $L_3$ -edge.

**Table S1.** Fitting results of the Sn K-edge FT-EXAFS spectra over the SnM samples.

| Samples          | Shell                | CN        | Bond length (Å) | $\sigma^2$ (Å <sup>2</sup> ) | E <sub>0</sub> shift (eV) | R factor |
|------------------|----------------------|-----------|-----------------|------------------------------|---------------------------|----------|
| SnO <sub>2</sub> | Sn-O                 | 6.0 ± 0.4 | 2.05 ± 0.01     | 0.0033                       | 7.6                       | 0.011    |
|                  | Sn-O-Sn <sup>a</sup> | 1.3 ± 0.4 | 3.23 ± 0.02     |                              |                           |          |
|                  | Sn-O-Sn <sup>b</sup> | 2.5 ± 0.7 | 3.73 ± 0.02     |                              |                           |          |
| SnZn             | Sn-O                 | 6.1 ± 0.3 | 2.05 ± 0.01     | 0.0040                       | 8.1                       | 0.007    |
|                  | Sn-O-Sn <sup>a</sup> | 1.2 ± 0.3 | 3.21 ± 0.02     |                              |                           |          |
|                  | Sn-O-Sn <sup>b</sup> | 1.6 ± 0.5 | 3.74 ± 0.02     |                              |                           |          |
| SnGa             | Sn-O                 | 5.8 ± 0.4 | 2.05 ± 0.01     | 0.0032                       | 7.6                       | 0.009    |
|                  | Sn-O-Sn <sup>a</sup> | 0.8 ± 0.4 | 3.24 ± 0.03     |                              |                           |          |
|                  | Sn-O-Sn <sup>b</sup> | 1.3 ± 0.6 | 3.72 ± 0.03     |                              |                           |          |
| SnBi             | Sn-O                 | 6.5 ± 0.3 | 2.06 ± 0.01     | 0.0046                       | 7.8                       | 0.006    |
|                  | Sn-O-Sn <sup>a</sup> | 1.7 ± 0.3 | 3.24 ± 0.01     |                              |                           |          |
|                  | Sn-O-Sn <sup>b</sup> | 1.3 ± 0.5 | 3.73 ± 0.03     |                              |                           |          |
| SnNi             | Sn-O                 | 5.9 ± 0.3 | 2.05 ± 0.01     | 0.0064                       | 8.1                       | 0.004    |
|                  | Sn-O-Sn <sup>a</sup> | 0.9 ± 0.3 | 3.23 ± 0.02     |                              |                           |          |
|                  | Sn-O-Sn <sup>b</sup> | 1.7 ± 0.5 | 3.73 ± 0.02     |                              |                           |          |
| SnCo             | Sn-O                 | 6.1 ± 0.3 | 2.05 ± 0.00     | 0.0041                       | 8.0                       | 0.005    |
|                  | Sn-O-Sn <sup>a</sup> | 0.8 ± 0.3 | 3.25 ± 0.02     |                              |                           |          |
|                  | Sn-O-Sn <sup>b</sup> | 1.4 ± 0.4 | 3.71 ± 0.02     |                              |                           |          |
| SnAg             | Sn-O                 | 6.1 ± 0.4 | 2.05 ± 0.01     | 0.0039                       | 7.7                       | 0.008    |
|                  | Sn-O-Sn <sup>a</sup> | 1.2 ± 0.4 | 3.24 ± 0.02     |                              |                           |          |
|                  | Sn-O-Sn <sup>b</sup> | 2.5 ± 0.6 | 3.74 ± 0.02     |                              |                           |          |

Notes: CN—average coordination number (normalized to all the absorbers) around the absorbing center atom;  $\sigma^2$ —mean square variation in path length; R-factor—quality of fitting. The “a” and “b” represented the shorter and longer Sn-O-Sn bonds, respectively. Fitting ranges:  $3.0 < k < 11 \text{ Å}^{-1}$ ,  $1 < R < 4 \text{ Å}$ ;  $k^1k^2k^3$ -weighted multiple EXAFS fittings.

**Table S2.** Fitting results of the Zn K-edge, Ga K-edge, Bi L<sub>3</sub>-edge, Ni K-edge, Co K-edge, and Ag K-edge FT-EXAFS spectra over the SnM samples.

| Samples                       | Shell             | CN        | Bond length<br>(Å) | $\sigma^2$<br>(Å <sup>2</sup> ) | E <sub>0</sub> shift<br>(eV) | R<br>factor |
|-------------------------------|-------------------|-----------|--------------------|---------------------------------|------------------------------|-------------|
| SnZn Zn K-edge                | Zn-O              | 3.2 ± 0.5 | 1.97 ± 0.01        | 0.0015                          | -0.9                         | 0.030       |
| SnGa Ga K-edge                | Ga-O              | 6.7 ± 1.0 | 1.92 ± 0.02        | 0.0073                          | 0.4                          | 0.023       |
| SnBi Bi L <sub>3</sub> K-edge | Bi-O <sup>a</sup> | 2.3 ± 1.1 | 2.16 ± 0.04        | 0.0046                          | -4.0                         | 0.065       |
|                               | Bi-O <sup>b</sup> | 1.2 ± 0.5 | 2.36 ± 0.08        |                                 |                              |             |
| SnNi Ni K-edge                | Ni-O              | 9.9 ± 1.9 | 2.01 ± 0.03        | 0.0130                          | -5.6                         | 0.022       |
| SnCo Co K-edge                | Co-O              | 3.8 ± 0.7 | 2.08 ± 0.01        | 0.0064                          | -0.1                         | 0.021       |
|                               | Co-Co             | 3.7 ± 0.9 | 2.50 ± 0.01        | 0.0064                          | -0.1                         | 0.021       |
| SnAg Ag K-edge                | Ag-Ag             | 7.6 ± 0.8 | 2.87 ± 0.01        | 0.0104                          | 0.6                          | 0.019       |

Notes: CN—average coordination number (normalized to all the absorbers) around the absorbing center atom;  $\sigma^2$ —mean square variation in path length; R-factor—quality of fitting. The “a” and “b” represented the shorter and longer Bi-O bonds, respectively. Fitting ranges: 3.0 < k < 11 (or 10.5) Å<sup>-1</sup>, 1 (or 1.1) < R < 3 (or 3.3) Å; k<sup>1</sup>k<sup>2</sup>k<sup>3</sup>-weighted multiple EXAFS fittings.

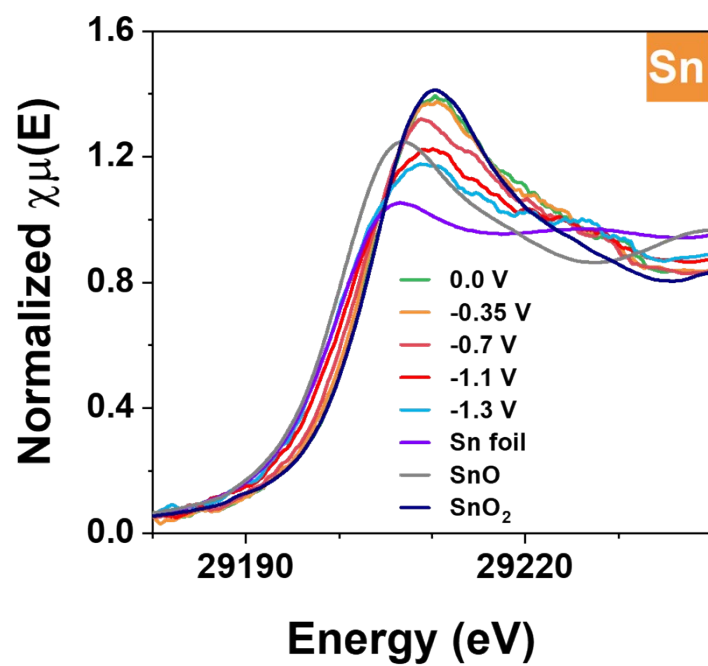

**Figure S19.** The *in-situ* Sn K-edge XANES spectra over Sn/C catalysts under different potentials.

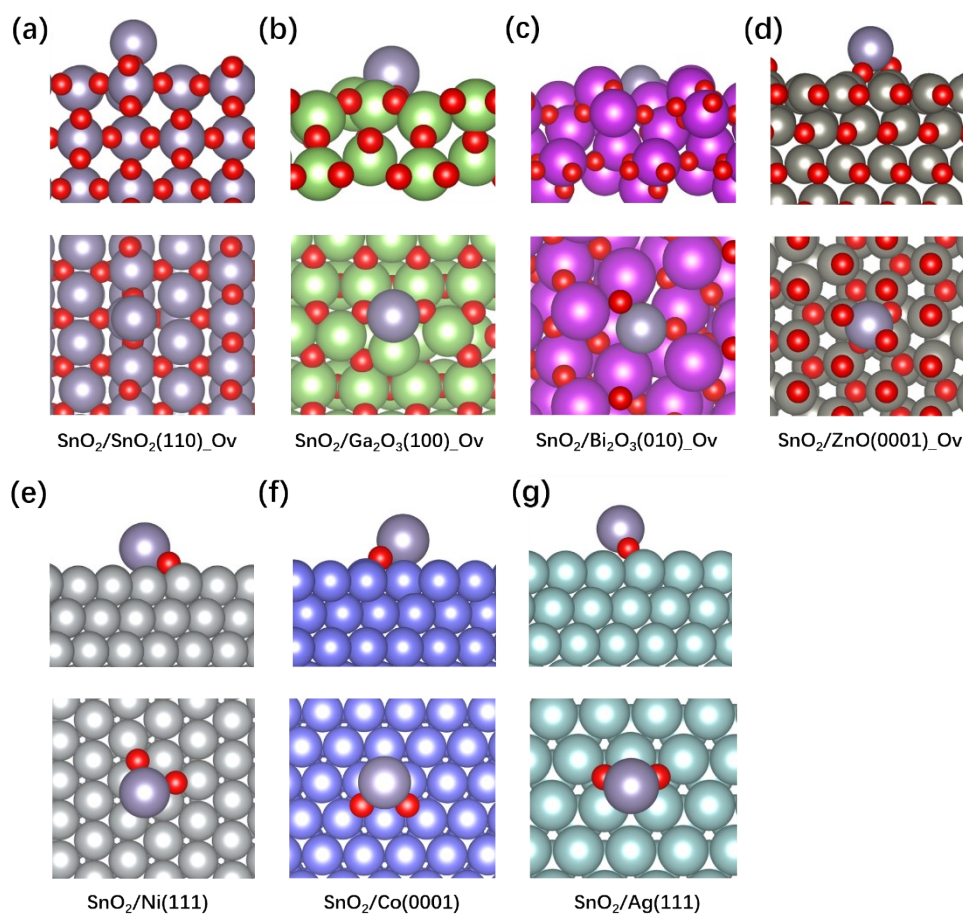

**Figure S20.** Top and side view of DFT optimized configurations of **a**  $\text{SnO}_2/\text{SnO}_2(110)_{\text{Ov}}$ , **b**  $\text{SnO}_2/\text{Ga}_2\text{O}_3(100)_{\text{Ov}}$ , **c**  $\text{SnO}_2/\text{Bi}_2\text{O}_3(010)_{\text{Ov}}$ , **d**  $\text{SnO}_2/\text{ZnO}(0001)_{\text{Ov}}$ , **e**  $\text{SnO}_2/\text{Ni}(111)$ , **f**  $\text{SnO}_2/\text{Co}(0001)$  and **g**  $\text{SnO}_2/\text{Ag}(111)$ . Red, gray purple, green, pink, dark gray, light gray, purple and cyan ball are represent O, Sn, Ga, Bi, Zn, Ni, Co and Ag atoms, respectively.

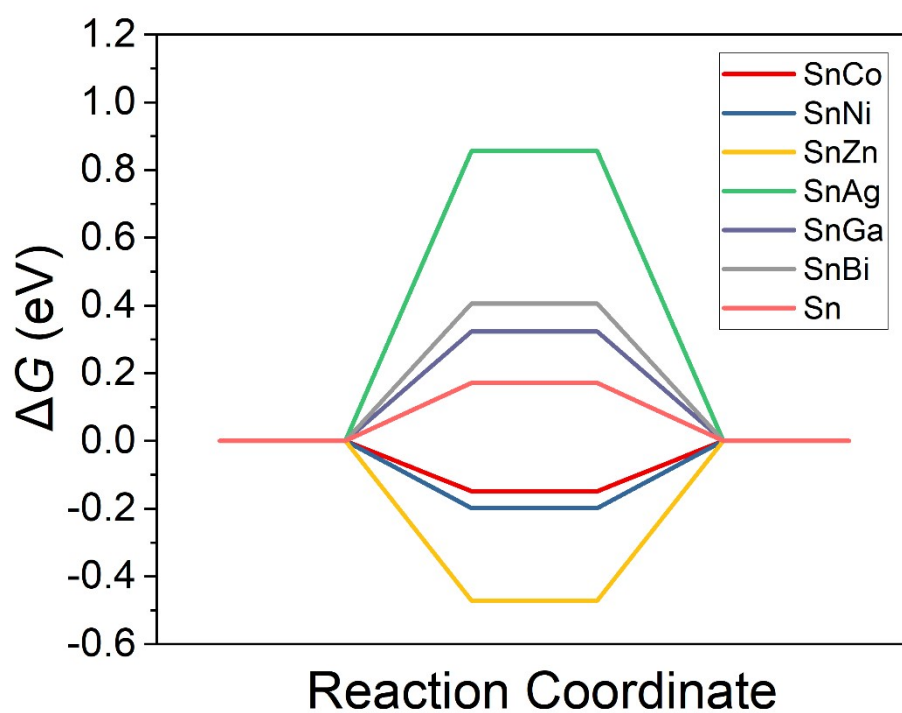

**Figure S21.** The free energy diagrams of HER on Sn-based catalysts.

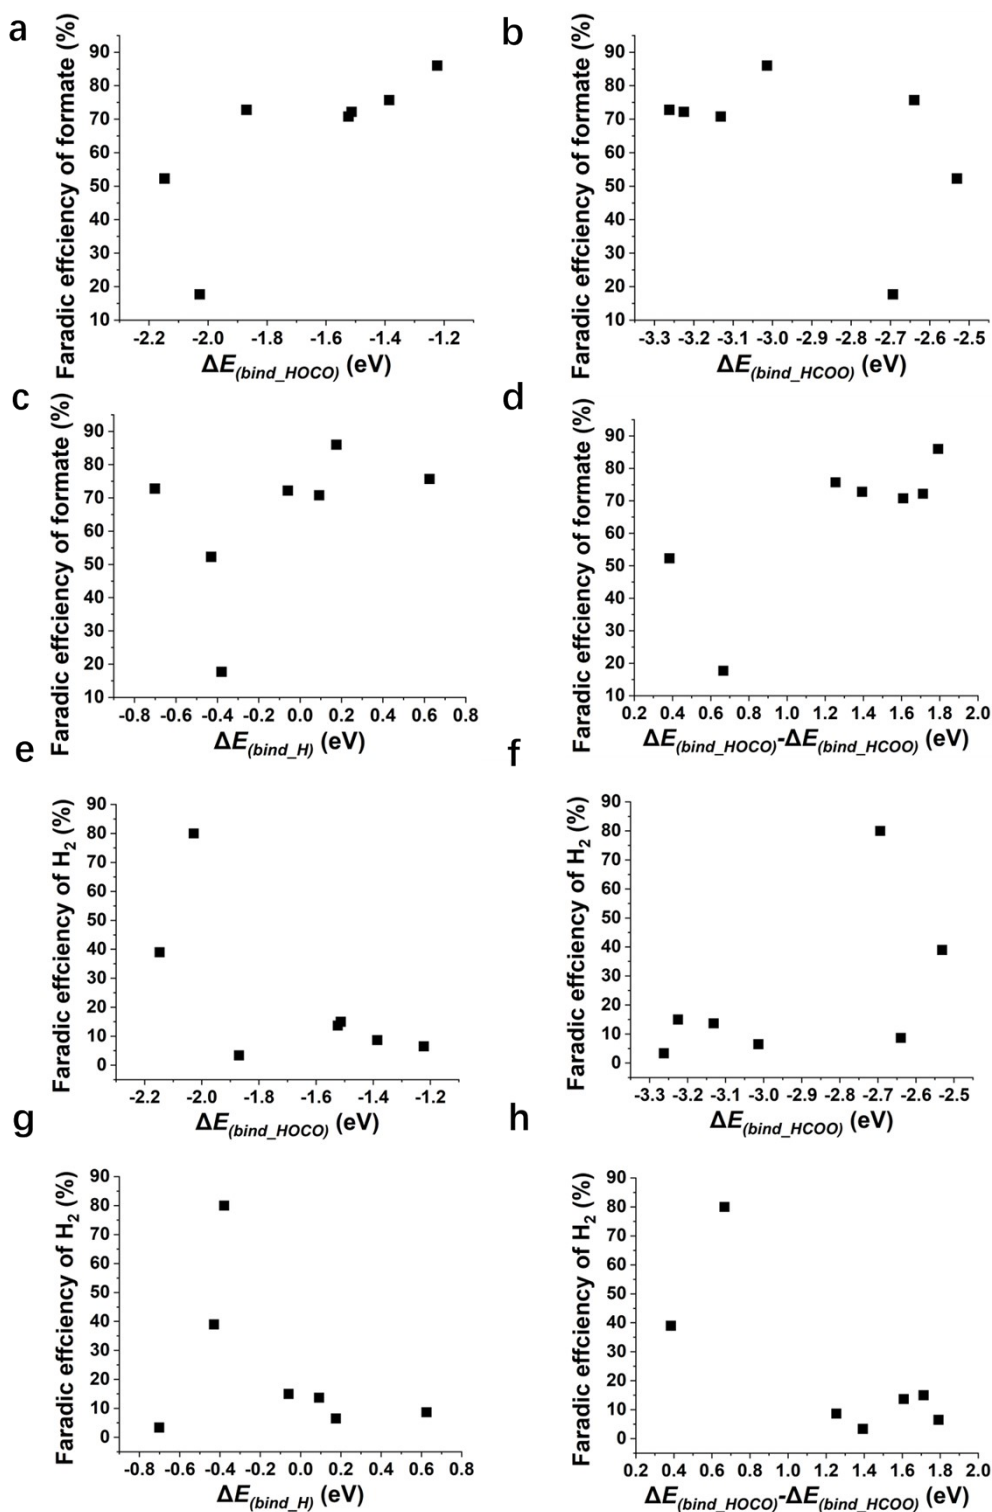

**Figure S22.** Correlation of **a**  $\Delta E_{(bind\_HOCO)}$ , **b**  $\Delta E_{(bind\_HCOO)}$ , **c**  $\Delta E_{(bind\_H)}$ , and **d**  $\Delta E_{(bind\_HOCO)} - \Delta E_{(bind\_HCOO)}$  versus FE<sub>formate</sub> at -0.85 V vs. RHE. Correlation of **e**  $\Delta E_{(bind\_HOCO)}$ , **f**  $\Delta E_{(bind\_HCOO)}$ , **g**  $\Delta E_{(bind\_H)}$ , and **h**  $\Delta E_{(bind\_HOCO)} - \Delta E_{(bind\_HCOO)}$  versus FE<sub>H<sub>2</sub></sub> at -0.85 V vs. RHE.



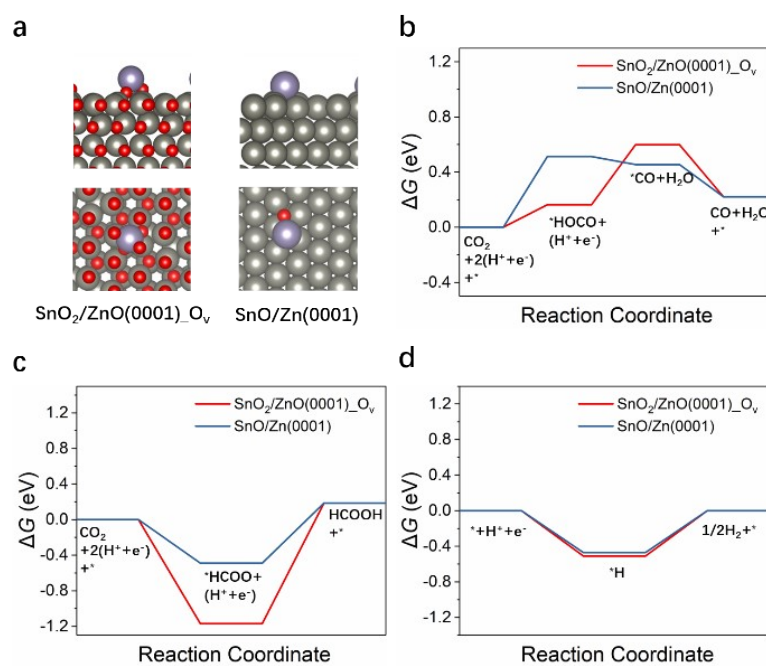

**Figure S23.** **a** Top and side view of DFT optimized configurations of SnO<sub>2</sub>/ZnO(0001)<sub>O<sub>v</sub></sub> and SnO/Zn(0001). The free energy diagrams of CO<sub>2</sub> conversion to **b** CO, **c** HCOOH and **d** H<sub>2</sub>.
